# Supplementary material for: Petrogenesis of the Wadi El-Faliq Gabbroic Intrusion in the Central Eastern Desert of Egypt: Implications for Neoproterozoic Post-Collisional Magmatism Associated with the Najd Fault System
Source: MDPI journal article supplement (doi:10.3390/min13010010), 2022-12-22
Supplement: s1 [file s1]

Archive with 2 entries (2 files):
- Supplementary Docuemt S1.pdf
- Supplementary Tables S1-S8.xls
