# Supplementary material for: Petrogenesis of the Wadi El-Faliq Gabbroic Intrusion in the Central Eastern Desert of Egypt: Implications for Neoproterozoic Post-Collisional Magmatism Associated with the Najd Fault System
Source: MDPI journal article supplement (doi:10.3390/min13010010), 2022-12-22
Supplement: s1 [file s1 › Supplementary Tables S1-S8.xls]

## Sheet: Table S1
Table S1:
Electron microprobe analyses of plagioclase from the Wadi El-Faliq gabbros.
Spot No.	11 / 3 .	12 / 3 .	13 / 3 .	14 / 3 .	15 / 3 .	16 / 3 .	17 / 3 .	18 / 3 .	19 / 3 .	20 / 3 .	21 / 3 .	22 / 3 .	25 / 3 .	26 / 3 .	27 / 3 .	28 / 3 .	29 / 4 .	30 / 4 .	31 / 4 .	32 / 4 .	33 / 4 .
SiO2	58.16	58.44	58.29	56.97	57.09	52.87	52.81	53.17	53.11	52.48	53.01	52.42	55.19	54.47	55.23	55.19	66.93	67.83	67.23	67.54	67.97
Al2O3	26.24	26.18	27.75	27.04	26.34	28.95	29.27	29.11	29.18	30.94	29.13	28.87	28.01	28.26	27.93	28.04	0.01	0.01	0.03	0.01	0.03
FeOtotal	0.03	0.05	0.01	0.03	0.02	0.02	0.02	0.03	0.01	0.01	0.03	0.01	0.12	0.28	0.19	0.17	20.09	19.46	20.15	20.23	19.87
CaO	8.48	9.18	7.63	8.91	9.34	12.96	12.94	12.04	12.79	12.15	12.26	13.55	10.46	10.86	10.91	10.73	0.19	0.16	0.09	0.11	0.13
Na2O	6.69	5.86	6.13	6.52	6.39	4.79	4.74	5.12	4.65	4.14	4.68	4.76	5.57	5.51	5.61	5.36	0.01	0.02	0.04	0.02	0.01
K2O	0.07	0.04	0.07	0.05	0.06	0.07	0.06	0.07	0.09	0.07	0.07	0.06	0.03	0.04	0.05	0.04	1.06	0.47	0.69	0.78	0.92
TiO2	0.02	0.09	0.04	0.01	0.01	0.02	0.02	0.01	0.02	0.02	0.02	0.01	0.01	0.01	0.01	0.01	10.89	11.15	11.14	11.21	10.92
MgO	0.01	0.01	0.01	0.02	0.01	0.02	0.02	0.02	0.01	0.02	0.03	0.02	0.03	0.02	0.04	0.02	0.03	0.01	0.01	0.02	0.01
Total	99.7	101.46	100.18	101.87	99.34	99.33	99.19	98.67	100.06	99.66	99.98	100.43	101.12	101.1	99.1	100.34	99.21	99.11	99.38	99.92	99.86
Formula based on 32 oxygen
Si	10.4329	10.4537	10.3696	10.2587	10.3197	9.63653	9.60538	9.67961	9.64959	9.49881	9.675	9.58006	9.99596	9.89369	9.97241	9.98624	11.8151	11.9552	11.8334	11.8301	11.8977
Al	5.54719	5.51896	5.81783	5.73827	5.61118	6.21856	6.2741	6.24545	6.2481	6.59972	6.26562	6.21796	5.97871	6.04927	5.94328	5.97929	0.00132772	0.00132565	0.00397154	0.00131741	0.00394966
Fe2+	0.0044999	0.00747878	0.00148755	0.00451719	0.00302302	0.00304821	0.00304181	0.00456684	0.00151927	0.00151349	0.00457844	0.00152818	0.0181739	0.0425268	0.0286868	0.0257214	4.1795	4.04212	4.17976	4.17593	4.09897
Ca	1.62966	1.75923	1.45417	1.71887	1.80874	2.53069	2.52148	2.34822	2.48957	2.35599	2.39721	2.65297	2.02963	2.11326	2.11043	2.08	0.028046	0.0235809	0.0132462	0.016111	0.019028
Na	2.32655	2.03219	2.11416	2.27615	2.23933	1.6926	1.67142	1.80705	1.63792	1.45273	1.65595	1.6865	1.95582	1.94026	1.9638	1.88025	0.00263172	0.00525523	0.0104962	0.00522255	0.00260959
K	0.0160172	0.00912697	0.0158846	0.0114848	0.0138347	0.0162749	0.0139206	0.0162554	0.0208586	0.0161615	0.0162967	0.0139872	0.00693098	0.00926766	0.0115161	0.00923232	0.200467	0.0887475	0.130112	0.146367	0.172527
Ti2+	0.00269836	0.0121086	0.00535205	0.00135437	0.00135957	0.00274178	0.00273603	0.00136925	0.00273309	0.00272268	0.00274546	0.00137456	0.00136225	0.00136613	0.00135805	0.00136092	3.72693	3.80995	3.80136	3.80664	3.70577
Mg	0.00267426	0.00266675	0.00265212	0.00536907	0.00269484	0.00543458	0.00542317	0.00542808	0.00270868	0.00539673	0.00816281	0.00544912	0.00810047	0.00541572	0.0107674	0.00539506	0.00675531	0.00224825	0.0022452	0.00446855	0.00223283
Total	19.9621	19.7954	19.7811	20.0147	19.9999	20.1059	20.0975	20.1079	20.053	19.933	20.0256	20.1598	19.9947	20.0551	20.0422	19.9675	19.9607	19.9285	19.9746	19.9862	19.9028
End members
An	41.0263	46.2889	40.5715	42.9021	44.5294	59.6921	59.9379	56.2917	60.0135	61.5965	58.9073	60.9394	50.8377	52.015	51.6536	52.3998	5.09556	2.27502	3.3076	3.6985	4.44597
Ab	58.5705	53.471	58.9853	56.8113	55.13	39.924	39.7312	43.3186	39.4837	37.981	40.6922	38.7393	48.9887	47.7569	48.0646	47.3676	94.7327	97.6673	96.6353	96.1886	95.4965
Or	0.403229	0.240149	0.443182	0.286654	0.340595	0.383881	0.330907	0.389676	0.502815	0.422537	0.400465	0.32129	0.173605	0.228111	0.28186	0.232583	0.171709	0.0576335	0.0570757	0.112914	0.0575394

## Sheet: Table S2
Table S2:
Electron microprobe analyses of amphibole from the Wadi El-Faliq gabbro.
Spot No.	13/1.	14/1.	26/1.	37/1.	40/2.	41/2.	54/2.	55/2.	57/2.	58/2.	59/2.	62/2.	63/2.	64/2.	1 / 1 .	2 / 1 .	12 / 1 .	18 / 1 .	38 / 1 .	3 / 2.	4 / 2.	15 / 2.	16 / 2.
SiO2	48.07	49.65	48.29	47.56	47.29	47.35	47.37	47.42	47.14	48.71	47.63	47.55	47.93	46.59	52.95	52.16	52.18	51.45	52.99	53.64	53.46	53.36	52.61
TiO2	1.26	0.59	0.99	1.46	1.11	1.54	1.31	1.29	1.55	1.28	1.47	1.23	1.36	1.61	0.28	0.26	0.26	0.34	0.23	0.31	0.27	0.24	0.27
Al2O3	7.44	5.27	6.63	7.58	6.74	8.04	7.22	6.95	6.75	7.07	8.04	6.89	7.02	8.65	2.84	4.31	3.74	3.71	2.91	2.15	2.71	2.11	2.65
MnO	0.25	0.3	0.25	0.29	0.17	0.11	0.09	0.12	0.11	0.08	0.21	0.15	0.17	0.19	0.24	0.23	0.25	0.26	0.22	0.18	0.21	0.17	0.23
FeO	11.75	14.02	13.69	13.1	12.94	12.71	12.54	13.31	12.65	12.31	13.15	12.87	13.29	12.66	10.2	10.65	10.5	12.08	11.55	11.71	10.82	10.69	11.61
MgO	15.53	15.05	14.02	14.71	16.29	14.75	15.89	14.97	15.18	15.26	14.75	15.67	14.8	15.02	18.01	17.62	17.84	16.46	17.33	17.51	17.54	17.63	16.97
CaO	12.09	12.11	12.13	11.91	12.08	11.56	11.49	11.79	11.81	12.04	11.39	11.14	11.65	11.26	12.44	12.13	12.29	12.54	12.5	12.19	12.46	12.62	13.01
Na2O	0.94	0.58	0.83	1.01	1.06	0.92	0.98	1.12	1.32	0.75	0.63	1.08	1.02	1.47	0.33	0.46	0.41	0.43	0.3	0.24	0.26	0.25	0.28
K2O	0.38	0.47	0.61	0.34	0.43	0.49	0.5	0.44	0.56	0.42	0.53	0.55	0.47	0.58	0.02	0.03	0.07	0.04	0.04	0.03	0.05	0.07	0.09
Total	97.71	98.04	97.44	97.96	98.11	97.47	97.39	97.41	97.07	97.92	97.8	97.13	97.71	98.03	97.31	97.85	97.54	97.31	98.07	97.96	97.78	97.14	97.72
FeO	7.755	9.253	11.157	8.843	5.642	8.605	6.37	8.771	9.171	8.74	8.968	7.053	9.29	8.28	6.508	6.475	6.017	7.876	7.704	8.747	8.061	7.686	8.255
Fe2O3	4.44	5.298	2.815	4.732	8.111	4.562	6.857	5.044	3.866	3.967	4.647	6.465	4.446	4.868	4.104	4.64	4.983	4.672	4.274	3.293	3.066	3.338	3.729
H2O+	2.08	2.07	2.06	2.07	2.07	2.08	2.08	2.07	2.06	2.08	2.08	2.08	2.07	2.07	2.12	2.11	2.11	2.09	2.1	2.11	2.11	2.11	2.1
Total	100.235	100.641	99.782	100.505	100.993	100.007	100.157	99.985	99.517	100.397	100.345	99.858	100.226	100.588	99.842	100.425	100.15	99.868	100.598	100.4	100.197	99.584	100.194
Formula based on 23 oxygen
T (ideally 8 apfu)
Si	6.903	7.148	7.047	6.854	6.768	6.839	6.814	6.881	6.88	6.987	6.857	6.872	6.93	6.709	7.511	7.364	7.388	7.374	7.502	7.609	7.577	7.611	7.507
Aliv	1.097	0.852	0.953	1.146	1.137	1.161	1.186	1.119	1.12	1.013	1.143	1.128	1.07	1.291	0.475	0.636	0.612	0.626	0.486	0.359	0.423	0.355	0.446
T	8	8	8	8	8	8	8	8	8	8	8	8	8	8	8	8	8	8	8	8	8	8	8
C (ideally 5 apfu)
Ti	0.136	0.064	0.109	0.158	0.024	0.167	0.142	0.141	0.17	0.138	0.159	0.134	0.148	0.174	0.016	0.028	0.028	0.037	0.012	0.001	0.029	0.026	0.029
Alvi	0.163	0.043	0.188	0.142		0.207	0.038	0.069	0.041	0.182	0.222	0.045	0.126	0.177		0.081	0.013	0.001			0.03
Fe3+	0.479	0.574	0.31	0.514	0.873	0.496	0.742	0.55	0.424	0.429	0.504	0.703	0.484	0.528	0.439	0.493	0.531	0.503	0.455	0.352	0.327	0.35	0.382
Fe2+	0.897	1.09	1.344	1.026	0.627	0.953	0.67	1.002	1.062	0.988	0.949	0.742	1.052	0.897	0.737	0.689	0.663	0.942	0.876	0.945	0.909	0.901	0.986
Mg	3.325	3.23	3.05	3.16	3.475	3.176	3.408	3.238	3.303	3.263	3.166	3.376	3.19	3.224	3.809	3.708	3.766	3.517	3.657	3.703	3.706	3.749	3.61
C	5	5.001	5.001	5	4.999	4.999	5	5	5	5	5	5	5	5	5	5	5	5	5	5	5	5	5
B (ideally 2 apfu)
Mn2+	0.03	0.037	0.031	0.035	0.021	0.013	0.011	0.015	0.014	0.01	0.026	0.018	0.021	0.023	0.029	0.028	0.03	0.032	0.026	0.022	0.025	0.021	0.005
Fe2+	0.035	0.025	0.017	0.04	0.048	0.085	0.096	0.063	0.058	0.06	0.13	0.111	0.071	0.1	0.035	0.075	0.049	0.003	0.037	0.093	0.047	0.016
Ca	1.86	1.868	1.897	1.839	1.852	1.789	1.771	1.833	1.847	1.85	1.757	1.725	1.805	1.737	1.891	1.835	1.865	1.926	1.896	1.853	1.892	1.929	1.989
Na	0.074	0.07	0.055	0.086	0.079	0.112	0.122	0.089	0.082	0.08	0.087	0.146	0.104	0.14	0.045	0.063	0.056	0.04	0.041	0.033	0.036	0.034	0.006
B	1.999	2	2	2	2	2	2	2	2	2	2	2	2	2	2	2	2	2	2	2	2	2	2
A (from 0 to 1 apfu)
Na	0.187	0.092	0.18	0.197	0.215	0.145	0.152	0.226	0.292	0.129	0.088	0.157	0.182	0.271	0.046	0.063	0.056	0.08	0.041	0.033	0.036	0.035	0.072
K	0.07	0.086	0.114	0.063	0.079	0.09	0.092	0.081	0.104	0.077	0.097	0.101	0.087	0.107	0.004	0.005	0.013	0.007	0.007	0.005	0.009	0.013	0.016
A	0.257	0.178	0.294	0.26	0.294	0.235	0.244	0.307	0.396	0.206	0.185	0.258	0.269	0.378	0.05	0.068	0.069	0.087	0.048	0.038	0.045	0.048	0.088
W (ideally 2 apfu)
OH	2	2	2	2	2	2	2	2	2	2	2	2	2	2	2	2	2	2	2	2	2	2	2
W	2	2	2	2	2	2	2	2	2	2	2	2	2	2	2	2	2	2	2	2	2	2	2
Sum T,C,B,A	15.256	15.179	15.295	15.26	15.293	15.233	15.244	15.307	15.397	15.206	15.185	15.258	15.27	15.378	15.051	15.068	15.07	15.088	15.049	15.04	15.046	15.048	15.089
Mg#	0.787541	0.747685	0.694128	0.754897	0.847148	0.769194	0.835704	0.763679	0.756701	0.767584	0.76938	0.819815	0.752004	0.782334	0.837879	0.843302	0.850305	0.788742	0.80675	0.796687	0.803034	0.806237	0.785466

## Sheet: Table S3
Table S3:
Electron microprobe analyses of biotite from the Wadi El-Faliq gabbro.
Spot No.	71/1.	72/1.	73/1.	74/1.	75/2.	76/2.	77/2.	78/2.	80/2.	83/2.	84/2.
SiO2	36.615	36.267	37.019	36.855	36.894	36.256	36.445	36.137	36.251	35.944	36.417
TiO2	5.112	4.749	4.435	4.313	4.516	4.519	4.714	4.458	4.632	4.398	4.385
Al2O3	13.631	13.539	13.915	13.901	13.721	14.269	14.136	14.634	14.093	14.417	14.359
FeO	19.894	20.507	19.019	19.341	19.197	20.162	20.294	20.529	20.966	21.091	20.575
MnO	0.091	0.091	0.121	0.147	0.099	0.141	0.137	0.097	0.087	0.151	0.117
MgO	11.041	11.315	11.815	11.837	11.705	11.557	11.411	10.367	10.612	10.487	10.504
CaO	0.007	0.011	0.018	0.019	0.099	0.028	0.025	0.008	0.089	0.017	0.029
Na2O	0.16	0.174	0.159	0.201	0.238	0.192	0.206	0.17	0.142	0.192	0.202
K2O	9.719	9.602	9.732	9.656	9.837	9.309	9.236	9.725	9.406	9.688	9.754
H2O*	3.93998	3.92525	3.96065	3.95468	3.95317	3.9494	3.95729	3.92307	3.92611	3.91877	3.93113
Total	100.21	100.18	100.194	100.225	100.259	100.382	100.561	100.048	100.204	100.304	100.273
Formula based on 22 oxygen
Si	5.57252	5.54026	5.6046	5.58818	5.59625	5.50471	5.52238	5.52347	5.5366	5.50001	5.55486
Aliv	2.42748	2.43785	2.3954	2.41182	2.40375	2.49529	2.47762	2.47653	2.4634	2.49999	2.44514
Alvi	0.0177584	0	0.0877601	0.0725887	0.0494248	0.0582946	0.0471208	0.159955	0.0736503	0.100246	0.136495
Ti	0.585111	0.545602	0.504974	0.491823	0.51517	0.516003	0.537197	0.512455	0.532044	0.506113	0.50303
Fe	2.53215	2.61997	2.40815	2.45261	2.43529	2.56014	2.57177	2.62424	2.67802	2.69904	2.62473
Mn	0.0117313	0.0117753	0.0155173	0.01888	0.01272	0.0181336	0.0175841	0.0125586	0.0112552	0.0195715	0.015117
Mg	2.5049	2.57669	2.66651	2.6755	2.64668	2.61571	2.57752	2.36212	2.41607	2.39209	2.38843
Ca	0.00114152	0.00180055	0.00292002	0.0030869	0.0160905	0.00455519	0.00405903	0.00131022	0.0145649	0.00278728	0.00473981
Na	0.0472164	0.0515405	0.0466764	0.059095	0.0700001	0.0565245	0.0605252	0.0503836	0.0420525	0.0569664	0.0597449
K	1.8867	1.87098	1.87936	1.8675	1.90324	1.8028	1.7851	1.896	1.83239	1.89086	1.89776
OH*	4	4	4	4	4	4	4	4	4	4	4
Total	19.5867	19.6565	19.6119	19.6411	19.6486	19.6322	19.6009	19.619	19.6001	19.6677	19.63
Mg-Li	2.5049	2.57669	2.66651	2.6755	2.64668	2.61571	2.57752	2.36212	2.41607	2.39209	2.38843
Fe+Mn+Ti-AlVI	3.11124	3.17735	2.84088	2.89073	2.91375	3.03598	3.07943	2.9893	3.14767	3.12448	3.00638

## Sheet: Table S4
Table S4:
Electron microprobe analyses of Fe-Ti oxides from the Wadi El-Faliq gabbro.
Mineral	Ilmenite				Magnetite
Spot No.	6 / 1 .	8 / 1 .	10 / 1 .	11 / 5 .	31 / 1 .	36 / 1 .	37 / 2 .	38 / 2 .
TiO2	53.85	53.7	53.4	53.61	0.24	0.11	0.21	0.36
Al2O3	0.02	0.01	0.01	0.01	0.12	0.16	0.11	0.09
FeO	43.52	42.88	43.35	43.19	91.21	92.45	91.72	91.63
MnO	2.61	2.59	2.54	2.56	0.01	0.02	0.02	0.01
MgO	0.18	0.19	0.14	0.17	0.07	0.02	0.04	0.03
Total	100.18	99.37	99.44	99.54	91.65	92.76	92.1	92.12
	Formula based on 3 oxygen				Formula based on 4 oxygen
Ti	1.02032	1.02603	1.01964	1.02254	0.00706079	0.00319784	0.00614966	0.0105436
Al	0.000593656	0.000299323	0.000299131	0.000298806	0.00553069	0.00728684	0.00504639	0.00412936
Fe3+	0.0412262	0.0523519	0.0395804	0.0453719	1.98035	1.98632	1.98265	1.97478
Fe2+	0.957881	0.963118	0.959739	0.961137	1.00265	1.00139	1.00317	1.00847
Mn	0.0556769	0.0557146	0.0546041	0.0549741	0.000331228	0.000654604	0.000659398	0.000329739
Mg	0.00675818	0.0071936	0.00529715	0.00642525	0.00408083	0.00115213	0.00232114	0.00174106
Total	2	2	2	2	3	3	3	3

## Sheet: Table S5
Table S5:
Electron microprobe analyses of titanite from the Wadi El-Faliq gabbro.
Spot No.	7 / 1 .	11 / 1 .	15 / 6 .	16 / 6 .	17 / 6 .
SiO2	29.81	30.35	29.92	29.87	30.27
TiO2	40.79	39.35	39.69	38.99	40.51
Al2O3	0.18	0.26	0.53	0.41	0.21
FeO	0.39	0.39	0.26	0.31	0.36
MnO	0.04	0.03	0.03	0.04	0.04
MgO	0.04	0.01	0.02	0.02	0.04
CaO	28.51	28.36	29.02	28.67	28.25
Na2O	0.04	0.04	0.03	0.05	0.04
Total	99.8	98.79	99.5	98.36	99.72

## Sheet: Table S6
Table S6:
Electron microprobe analyses of pyrite and pentlandite from the Wadi El-Faliq gabbro.
Mineral	Pyrite						Pentlandite
Spot No.	20 / 1 .	21 / 1 .	22 / 1 .	23 / 1 .	47 / 1 .		24 / 1 .	48 / 1 .
S	39.421	39.66	39.405	39.569	39.395		36.18	35.19
Fe	58.237	58.435	58.011	58.234	57.441		28.828	31.37
Ti	0.015	0.008	0.013	0.004	0.01		0.001	0.001
Ni	0.05	0.24	0.16	0.12	0.08		32.456	27.15
Co	0.02	0.011	0.08	0.06	0.14		2.41	5.19
Mn	0.001	0.01	0.028	0.02	0.03		0.005	0.001
Mg	0.001	0.008	0.012	0.035	0.01		0.007	0.003
Al	0.006	0.007	0.007	0.005	0.007		0.006	0.004
Ca	0.134	0.145	0.255	0.098	0.074		0.085	0.014
Total	97.885	98.524	97.971	98.145	97.187		99.978	98.923

## Sheet: Table S7
Table S7:
Electron microprobe analyses of chlorite from the Wadi El-Faliq gabbro.
Spot No.	3 / 1 .	4 / 1 .	5 / 1 .	9 / 1 .	3 / 4 .	3 / 5 .	3 / 6 .
SiO2	26.87	26.9	26.97	27.06	26.83	26.99	27.11
TiO2	0.04	0.04	0.05	0.04	0.04	0.03	0.05
Al2O3	19.97	20.32	20.39	20.47	20.11	20.24	20.07
FeO	21.03	20.73	20.85	21.03	20.81	20.95	21.12
MnO	0.15	0.18	0.18	0.15	0.17	0.18	0.16
MgO	17.96	18.06	18.62	18.5	18.36	18.28	18.61
CaO	0.13	0.1	0.11	0.11	0.12	0.09	0.14
Na2O	0.01	0.01	0.01	0.01	0.01	0.01	0.01
K2O	0.01	0.01	0.02	0.02	0.02	0.01	0.01
Total	85.3	85.562	87.2	87.39	86.47	86.78	87.28
Formula based on 28 oxygen
Si	5.61518	5.5961	5.56446	5.57147	5.58464	5.59539	5.59681
AlIV	2.38482	2.4039	2.43554	2.42853	2.41536	2.40461	2.40319
Sum T	8	8	8	8	8	8	8
AlVI	2.54284	2.58884	2.52889	2.54611	2.52496	2.54912	2.48571
Ti	0.00628654	0.00625819	0.00775831	0.00619381	0.00626167	0.0046774	0.00776312
Fe3+	0.0916653	0.10651	0.0562537	0.0679644	0.0635915	0.0823837	0.0514694
Fe2+	3.58379	3.50018	3.54143	3.55327	3.55902	3.54996	3.59506
Mn	0.0265521	0.0317188	0.0314576	0.0261604	0.0299733	0.031609	0.0279796
Mg	5.5949	5.60068	5.72678	5.6781	5.69687	5.64928	5.72726
Ca	0.0291094	0.0222909	0.024318	0.0242677	0.0267639	0.0199924	0.0309694
Na	0.00810414	0.0080676	0.00800115	0.00798459	0.00807208	0.00803967	0.00800611
K	0.00533108	0.00530704	0.0105267	0.0105049	0.01062	0.00528867	0.0052666
Cations	19.8886	19.8698	19.9354	19.9206	19.9261	19.9004	19.9395
Fe/(Fe+Mg)	0.396474	0.391717	0.385833	0.389408	0.388714	0.391348	0.389014

## Sheet: Table S8
Table S8:
Electron microprobe analyses of epidote from the Wadi El-Faliq gabbro.
Spot No.	32 / 1 .	33 / 1 .	34 / 1 .	36 / 7 .	37 / 7 .	38 / 7 .
SiO2	36.879	37.183	36.78	37.115	37.452	36.419
TiO2	0.114	0.119	0.113	0.116	0.115	0.161
Al2O3	26.798	27.155	25.988	26.821	26.419	26.824
FeO	9.481	8.691	9.859	9.635	9.839	9.311
MnO	0.024	0.071	0.013	0.052	0.083	0.079
MgO	0.474	1.31	0.666	0.131	0.124	0.341
CaO	23.086	23.336	23.169	23.401	23.251	24.204
Na2O	0.008	0.028	0.011	0.041	0.036	0.026
Total	96.864	97.893	96.599	97.312	97.319	97.365
Cations based on 12.5 Oxygens
Si	2.90535	2.89592	2.91172	2.9131	2.93829	2.86826
Ti	0.00675649	0.00697246	0.00672997	0.00684953	0.00678758	0.00953924
Al	2.48815	2.49257	2.42474	2.48105	2.44282	2.48983
Fe3+	0.624658	0.566083	0.652738	0.632449	0.645565	0.613275
Mn	0.00160146	0.00468367	0.000871701	0.00345697	0.00551549	0.00526992
Mg	0.0556684	0.152098	0.0786001	0.0153281	0.0145028	0.0400365
Ca	1.94869	1.94734	1.96526	1.96795	1.9545	2.04245
Na	0.00122195	0.00422809	0.00429774	0.00623927	0.00547605	0.00397016
Xps	0.200673	0.185076	0.212102	0.203131	0.20903	0.197633
